# Supplementary material for: The miR-644a/CTBP1/p53 axis suppresses drug resistance by simultaneous inhibition of cell survival and epithelial-mesenchymal transition in breast cancer
Source: PubMed Central journal article supplement (PMC5226553; doi:10.18632/oncotarget.10489), 2016-07-08
Supplement: oncotarget-07-49859-s001.pdf [file oncotarget-07-49859-s001.pdf]

# The miR-644a/CTBP1/p53 axis suppresses drug resistance by simultaneous inhibition of cell survival and epithelial-mesenchymal transition in breast cancer

## Supplementary Materials

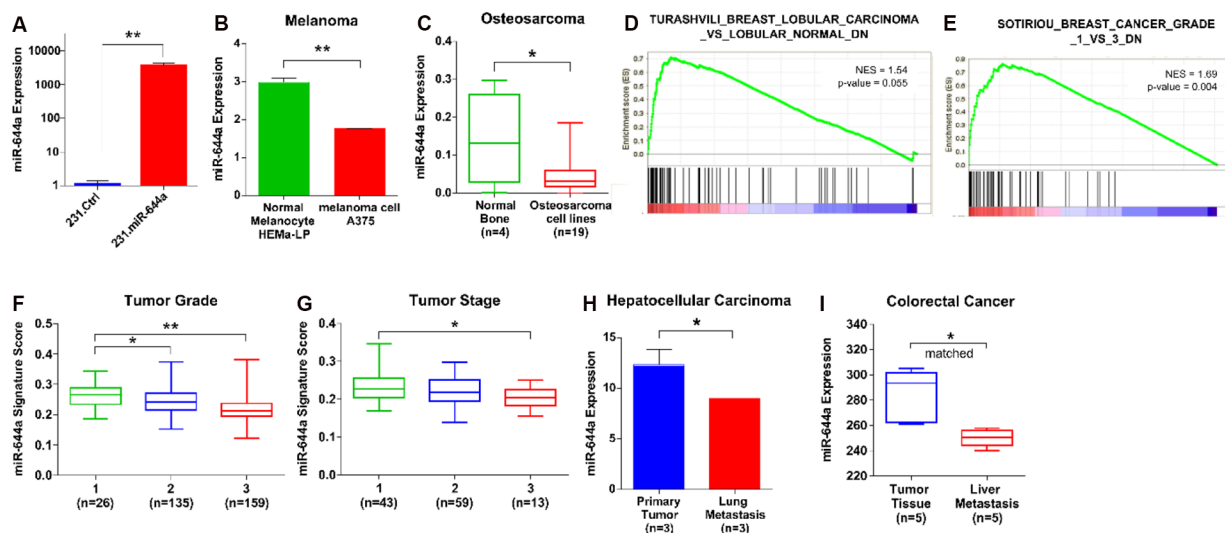

**Supplementary Figure S1: Confirmation of miR-644a overexpression in 231.miR-644a stable cells and correlation of miR-644a loss with formation and metastasis of different cancers.** (A) qRT-PCR analysis of miR-644a in 231.miR-644a stable cells. (B and C) miR-644a expression in melanoma (B) and osteosarcoma cell lines (C) as compared to a normal melanocyte cell line and normal bone, respectively. (D and E) Enrichment plots of patients from GSE58644 ( $n = 320$ ) with high or low miR-644a signature score. Genes downregulated in breast lobular carcinoma as compared to normal lobular breast tissues (D) were enriched in patients expressing high levels of miR-644a signature score. Genes downregulated as breast tumors progress through histologic grade 3 were enriched in patients with high miR-644a signature score (E). (F and G) Changes in miR-644a signature score with tumor grade (F) and stage (G) in patients from GSE58644. (H and I) miR-644a expression in a lung metastasis of hepatocellular carcinoma (H) and liver metastasis of colorectal cancer (I) as compared to primary tumors. Statistical significance was indicated (\* $p < 0.05$ ; \*\* $p < 0.01$ ; ns, not significant). Column data represent mean  $\pm$  SD. Box-plots depict median number and the 25th to 75th quartiles. Upper and lower whiskers represent the minimum and maximum values in the corresponding group. This applies to all figures shown.

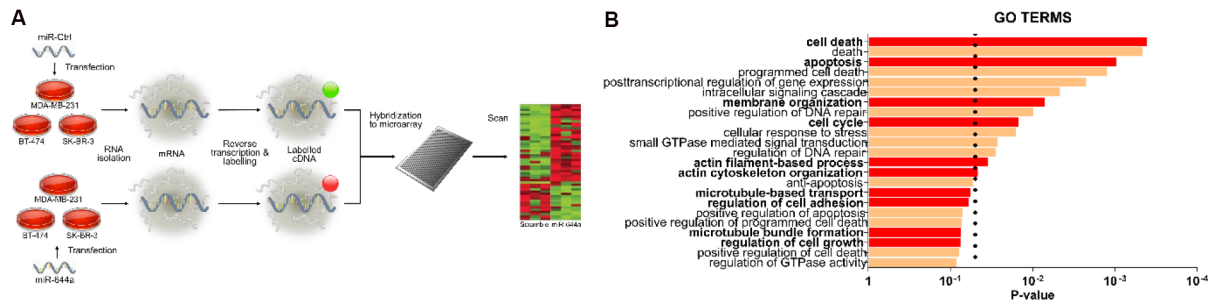

**Supplementary Figure S2: Identification of miR-644a gene signature and its roles in cancer. (A) Scheme for microarray analysis performed to obtain a miR-644a gene signature. (B) GO terms associated with miR-644a signature.**

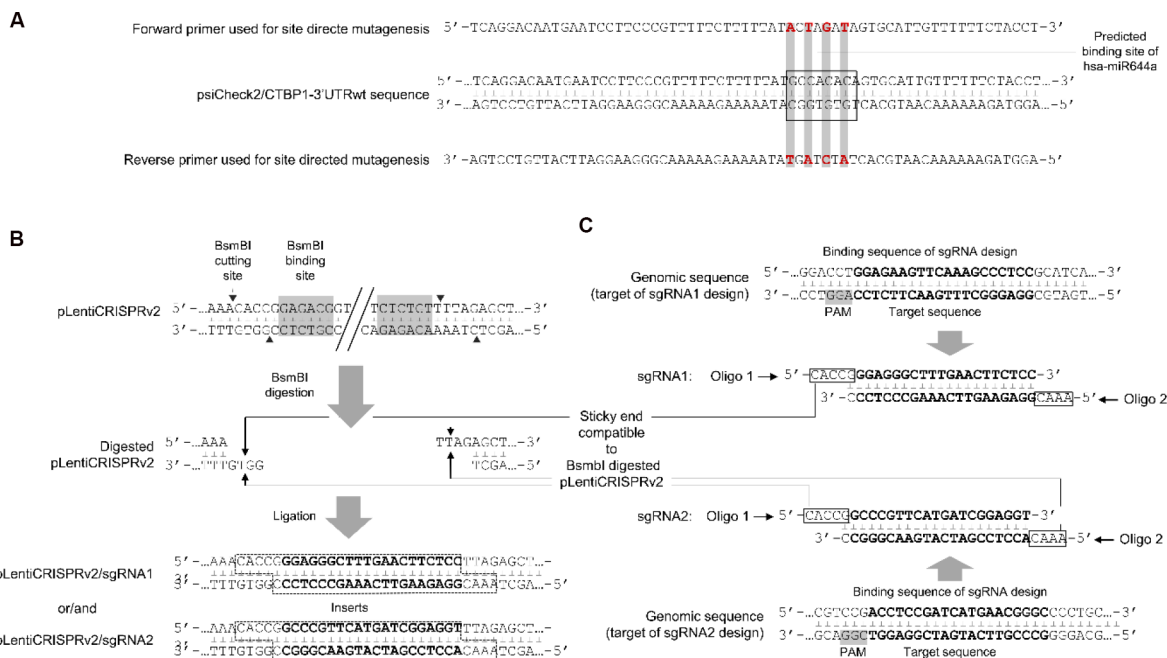

**Supplementary Figure S3: Primer and sgRNA design for site-directed mutagenesis and CTBP1 knockout. (A) Primer sequences used for site-directed mutagenesis assay. (B and C) Design of sgRNAs used in CRISPR-Cas9 mediated knock-out of CTBP1.**

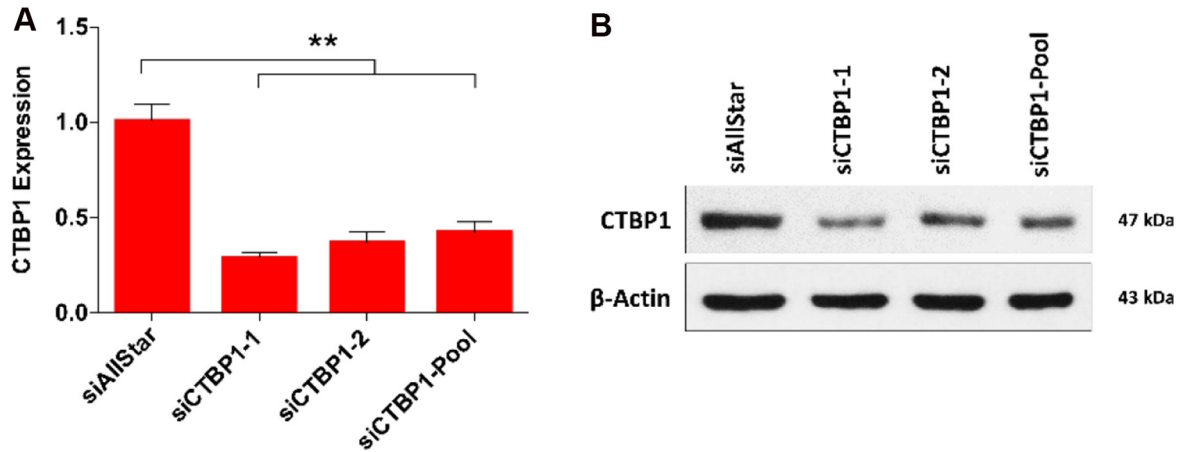

**Supplementary Figure S4: Confirmation of CTBP1 knockdown with siRNA silencing.** (A and B) qRT-PCR (A) and Western Blot (B) analysis of CTBP1 levels in MDA-MB-231 cells transfected with control siRNA (siAllstar) or different CTBP1 targeting siRNAs (siCTBP1-1, siCTBP1-2 and siCTBP1-Pool).  $n = 3$  for A.

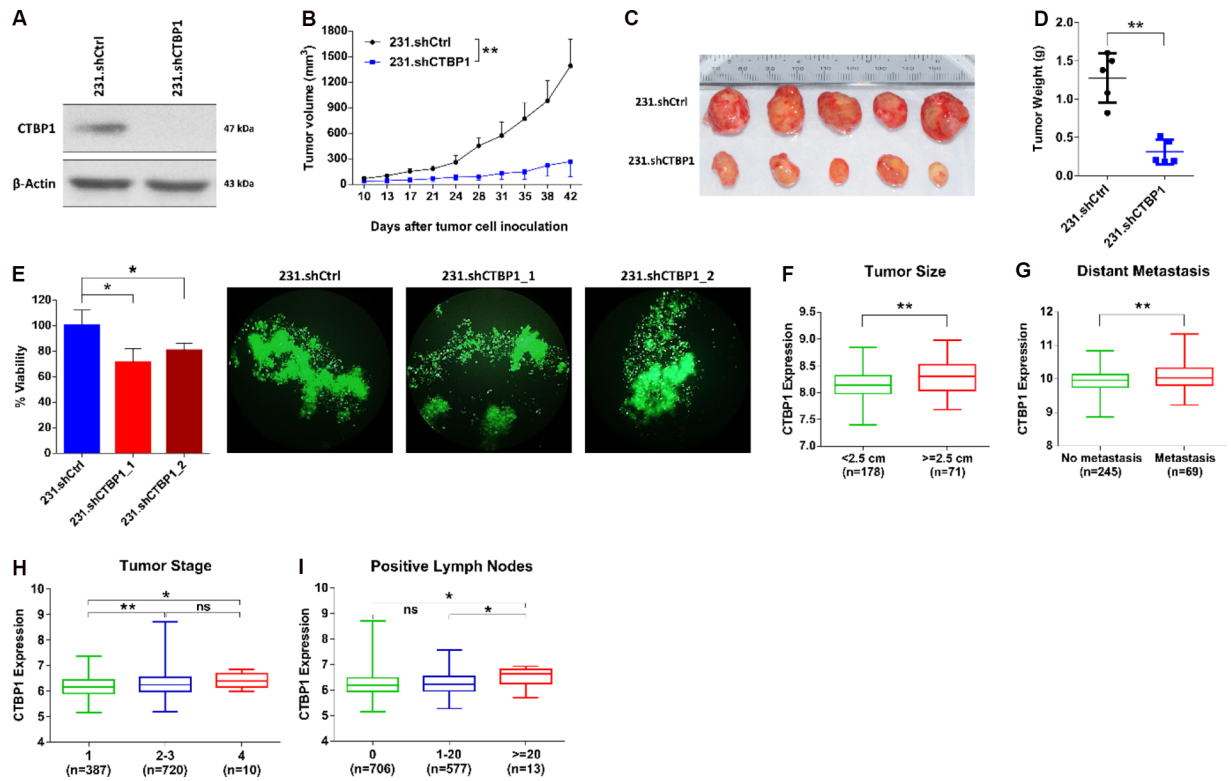

**Supplementary Figure S5: CTBP1 is mediating breast cancer formation, progression and metastasis.** (A) Western Blot analysis of CTBP1 levels in MDA-MD-231 cells stably expressing either a non-targeting shRNA (231.shCtrl) or a CTBP1 targeting shRNA (231.shCTBP1) confirming stable knockdown of CTBP1. (B) Tumor progression in xenografts generated with orthotopic injection of 231.shCtrl or 231.shCTBP1 cells.  $n = 5$ . (C) Representative images of tumors collected from xenografts of (B) on day 42. (D) Tumor weights in xenografts from (B) at day 42. (E) Viability of 231.shCtrl, 231.shCTBP1\_1 and shCTBP1\_2 cells grown in anchorage-independent conditions for 7 days, quantified by WST-1 assay (left) together with their fluorescence microscopy images with 10X magnification (right). (F and G) Changes in CTBP1 expression in breast tumors with tumor size from GSE4922 (F) and with presence of distant metastasis (G) from GSE58644. (H and I) Changes in CTBP1 expression in breast tumors with tumor stage (H) and number of positive lymph nodes (I) from METABRIC data.

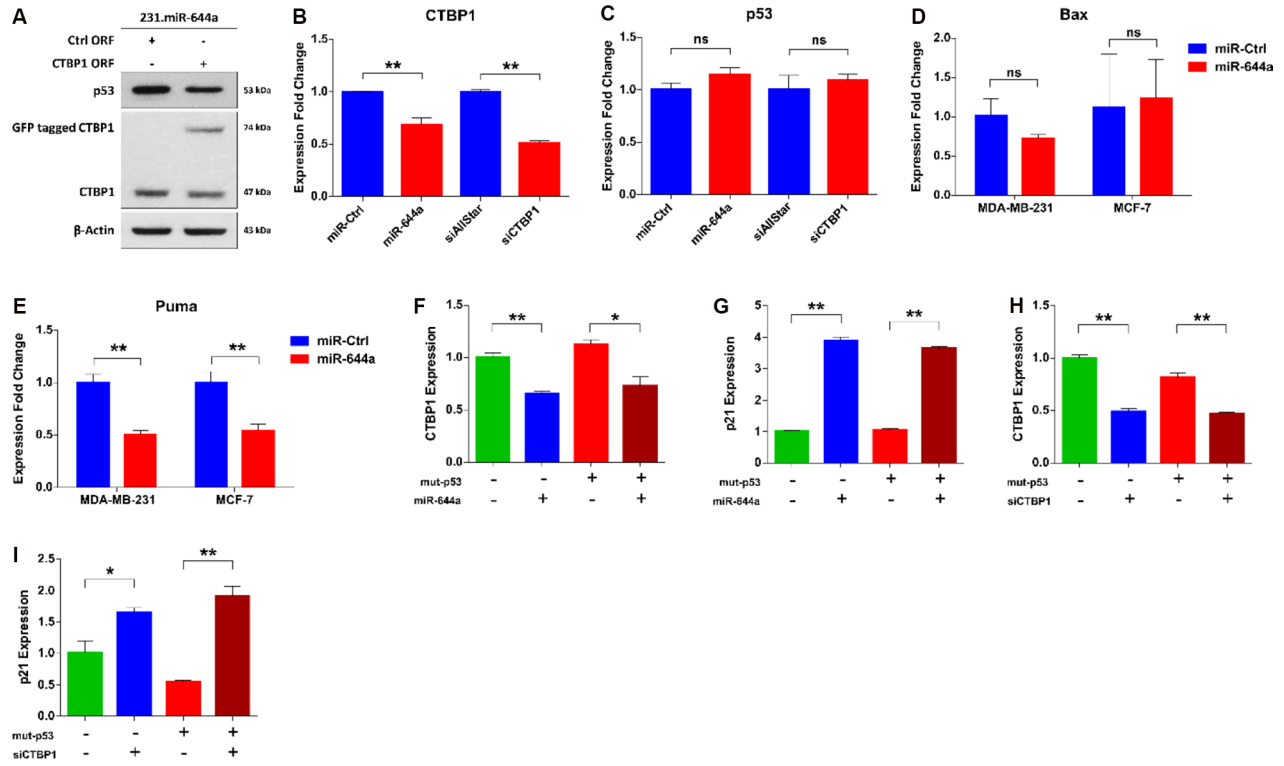

**Supplementary Figure S6: Effects of miR-644a or CTBP1 knockdown on p53, p21 and two apoptotic markers, Bax and Puma expression in the absence or presence of mut-p53.** (A) Western Blot analysis of p53 and CTBP1 levels in 231.miR-644a cells transfected with either Ctrl ORF or CTBP1 ORF showing downregulation of p53 with rescue of CTBP1 expression. (B and C) qRT-PCR analysis of CTBP1 (B) and p53 (C) expression in MCF-7 cells upon miR-644a overexpression or CTBP1 knockdown with siCTBP1-Pool. (D and E) qRT-PCR analysis of Bax (D) and Puma (E) expression in MDA-MB-231 and MCF-7 cells transfected with miR-Ctrl or miR-644a. (F-I) qRT-PCR analysis of CTBP1 (F and H) and p21 (G and I) expression in p53-wt MCF-7 cells overexpressing miR-644a or having knockdown of CTBP1 in the absence or presence of *mut-p53*.

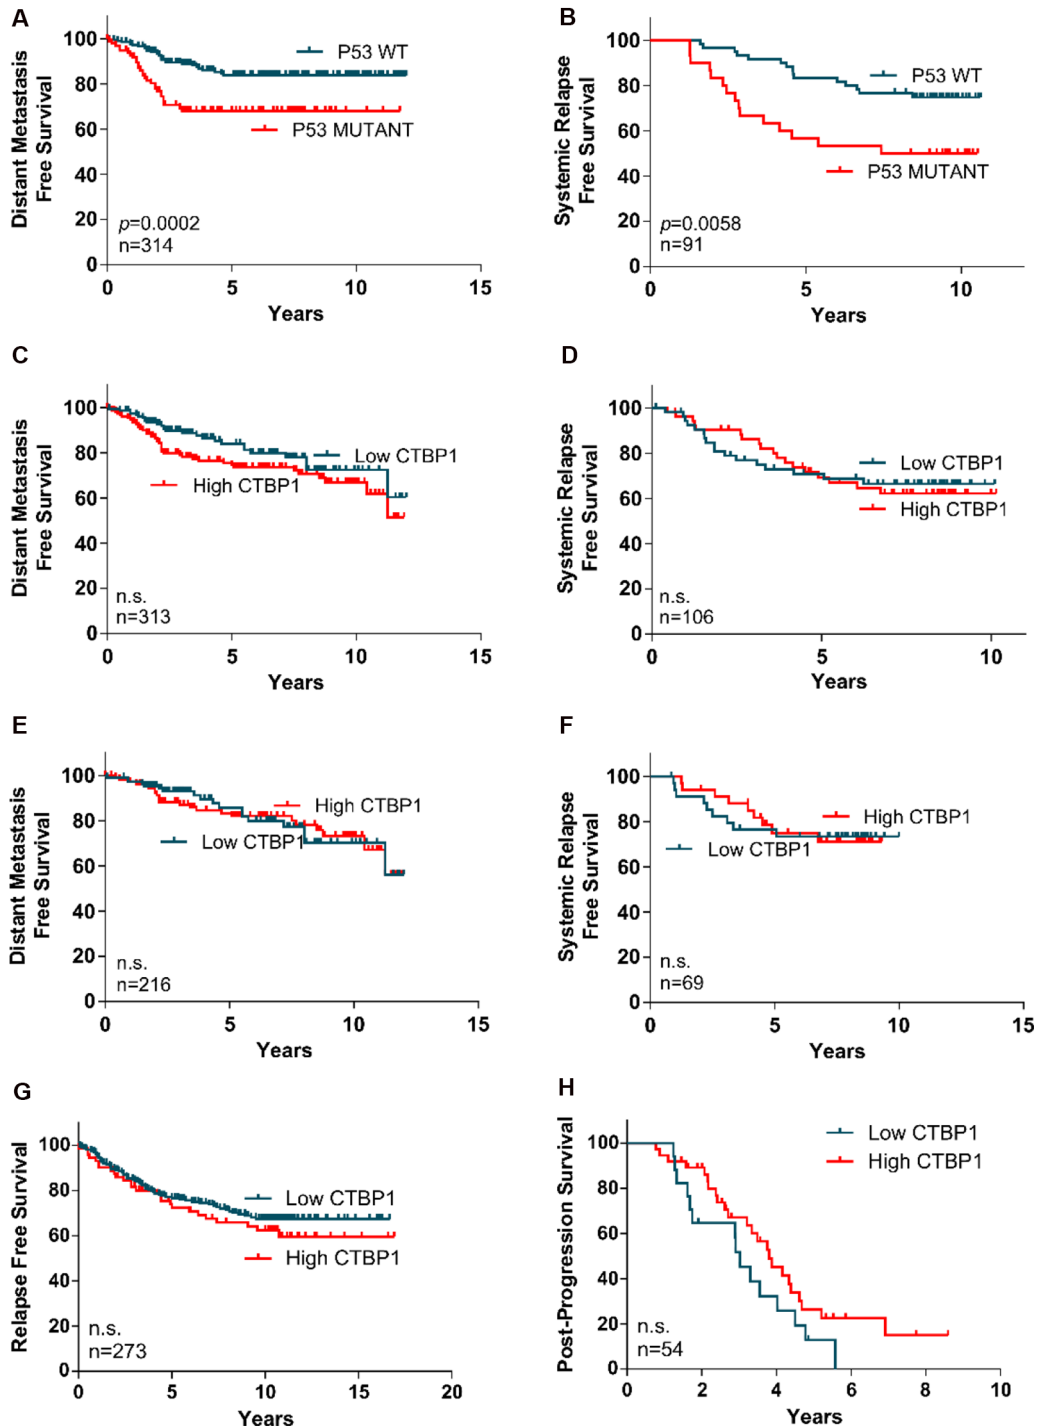

**Supplementary Figure S7: Effects of p53 status and CTBP1 levels on the survival of breast and ovarian cancer patients.** (A and B) Kaplan Meier survival curves of breast cancer patients based on p53 status in datasets GSE58644 representing percentage distant metastasis free survival (A) and in GSE19536 representing percentage systemic relapse free survival (B). (C and D) Kaplan Meier survival curves of breast cancer patients based on CTBP1 median expression from datasets in A and B. (E and F) Kaplan Meier survival curves of p53-*wt* breast cancer patients based on CTBP1 median expression from datasets in A and B. (G and H) Kaplan Meier survival curve of p53-*wt* breast (G) and ovarian (H) cancer patients based on best cut-off for CTBP1 expression levels in KM Plotter ( $n = 273$  for G,  $n = 54$  for H) representing percentage relapse free (G) and post-progression (H) survival.

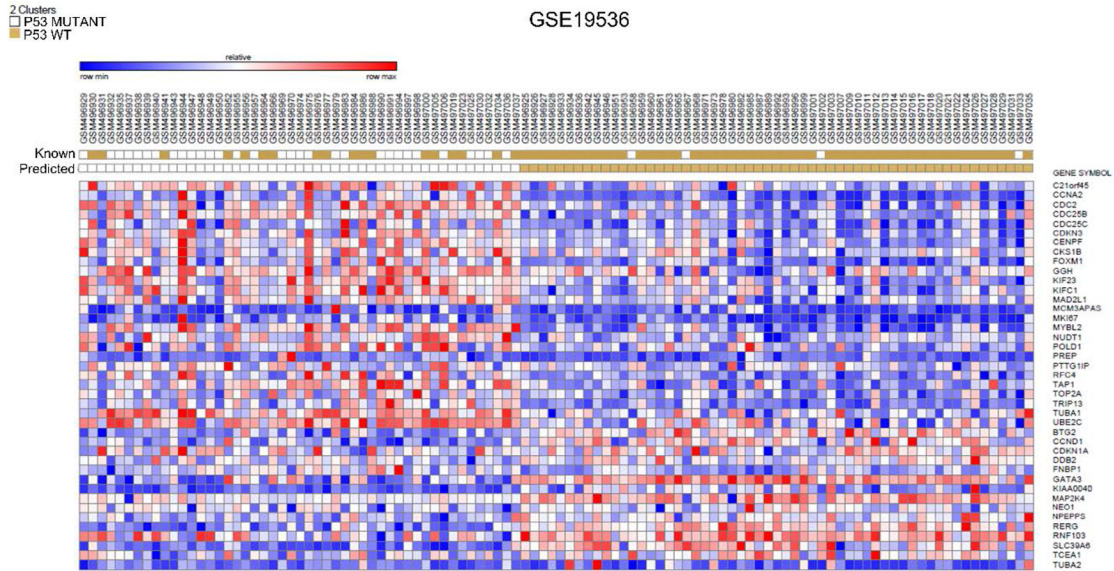

**Supplementary Figure S8: Validation of the p53 status signature in a dataset containing patients with known p53 status.** Heatmap of patients from GSE19536 clustered as p53-*wt* and p53-*mut* according to p53 status signature expression together with their known p53 status.

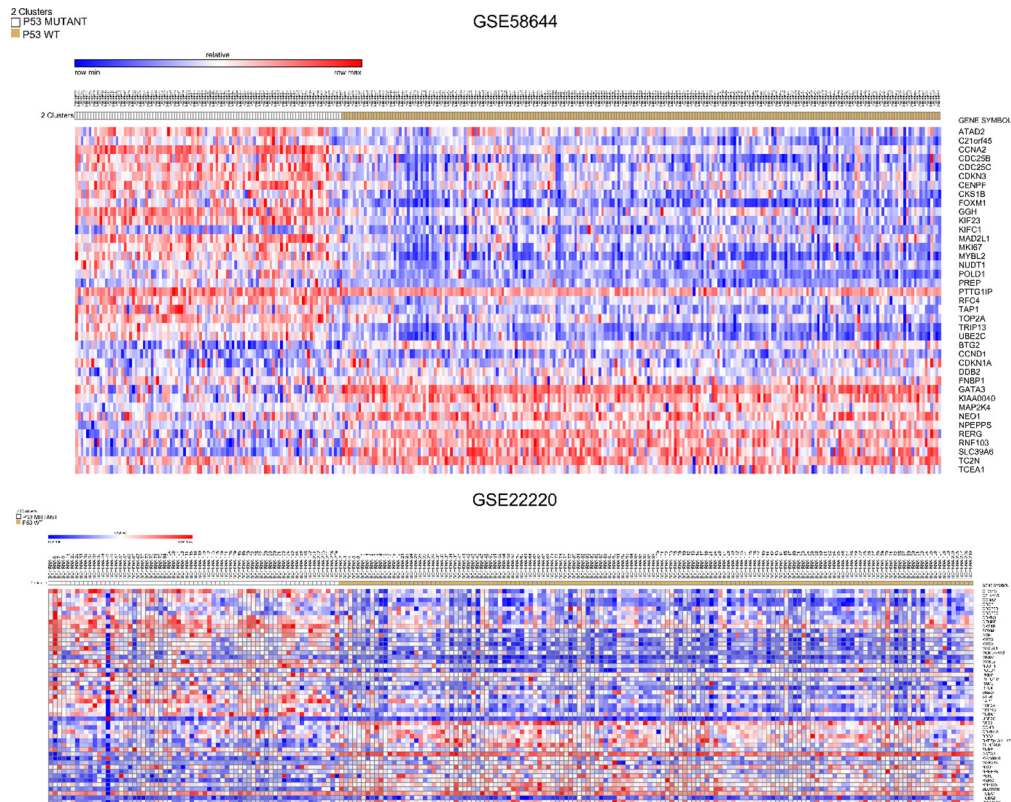

**Supplementary Figure S9: Separation of patients in two different datasets according to p53 status.** Heatmap of patients from GSE58644 and GSE22220 clustered as p53-*wt* and p53-*mut* according to p53 status signature expression.

**Supplementary Table S1: Common differentially expressed genes among three cell lines upon miR-644a transfection. See Supplementary\_Table\_S1**

**Supplementary Table S2: Enrichment of gene sets related to cancer formation and progression of different cancer types in patients with low and high miR-644a signature scores**

| Name of the gene set                                           | Normalized Enrichment Score (NES) | p-value |
|----------------------------------------------------------------|-----------------------------------|---------|
| <b>Gene Sets associated with low miR-644a signature score</b>  |                                   |         |
| LOPEZ_MESOTELIOMA_SURVIVAL_TIME_UP                             | -1.499                            | 0.008   |
| WEST_ADRENOCORTICAL_CARCINOMA_VS_ADENOMA_UP                    | -1.704                            | 0.008   |
| POMEROY_MEDULLOBLASTOMA_PROGNOSIS_DN                           | -1.714                            | 0.012   |
| MONTERO_THYROID_CANCER_POOR_SURVIVAL_UP                        | -1.420                            | 0.012   |
| SHEDDEN_LUNG_CANCER_POOR_SURVIVAL_A6                           | -1.633                            | 0.021   |
| KAUFFMANN_MELANOMA_RELAPSE_UP                                  | -1.543                            | 0.035   |
| MEINHOLD_OVARIAN_CANCER_LOW_GRADE_DN                           | -1.538                            | 0.037   |
| <b>Gene Sets associated with high miR-644a signature score</b> |                                   |         |
| WAMUNYOKOLI_OVARIAN_CANCER_GRADES_1_2_DN                       | 1.683                             | 0.003   |
| WOO_LIVER_CANCER_RECURRENCE_UP                                 | 1.480                             | 0.050   |
| LANDIS_BREAST_CANCER_PROGRESSION_DN                            | 1.664                             | 0.013   |

**Supplementary Table S3: Enrichment of gene sets related to metastasis and drug resistance in patients with low and high miR-644a signature scores**

| Name of the gene set                                           | Normalized Enrichment Score (NES) | p-value |
|----------------------------------------------------------------|-----------------------------------|---------|
| <b>METASTASIS</b>                                              |                                   |         |
| <b>Gene Sets associated with low miR-644a signature score</b>  |                                   |         |
| WANG_METASTASIS_OF_BREAST_CANCER_ESR1_UP                       | -1.57                             | 0.032   |
| <b>Gene Sets associated with high miR-644a signature score</b> |                                   |         |
| CHANDRAN_METASTASIS_DN                                         | 1.494                             | 0.034   |

|                                                                |        |       |
|----------------------------------------------------------------|--------|-------|
| <b>DRUG RESISTANCE</b>                                         |        |       |
| <b>Gene Sets associated with low miR-644a signature score</b>  |        |       |
| KANG_DOXORUBICIN_RESISTANCE_UP                                 | -1.557 | 0.008 |
| KOBAYASHI_EGFR_SIGNALING_24HR_DN                               | -1.593 | 0.017 |
| KIM_GASTRIC_CANCER_CHEMOSENSITIVITY                            | -1.537 | 0.035 |
| <b>Gene Sets associated with high miR-644a signature score</b> |        |       |
| RIGGINS_TAMOXIFEN_RESISTANCE_DN                                | 1.452  | 0.026 |

**Supplementary Table S4: Summary of the GEO datasets used in this study**

| Dataset          | Cancer Type       | Study Design                                                                                                                                                                                | Samples                                            | Array Type                                                                                                                                                                             | URL                                                                                                                                 |
|------------------|-------------------|---------------------------------------------------------------------------------------------------------------------------------------------------------------------------------------------|----------------------------------------------------|----------------------------------------------------------------------------------------------------------------------------------------------------------------------------------------|-------------------------------------------------------------------------------------------------------------------------------------|
| GSE4922          | Breast            | Three breast cancer cohorts (Uppsala ( $n = 249$ ), Stockholm ( $n = 58$ ) and Singapore ( $n = 40$ )) were reanalyzed for mRNA expression.                                                 | 289                                                | [HG-U133A] Affymetrix Human Genome U133A Array ( <i>mRNA</i> )<br>[HG-U133B] Affymetrix Human Genome U133B Array ( <i>mRNA</i> )                                                       | <a href="http://www.ncbi.nlm.nih.gov/geo/query/acc.cgi?acc=GSE4922">http://www.ncbi.nlm.nih.gov/geo/query/acc.cgi?acc=GSE4922</a>   |
| GSE2603          | Breast            | Subpopulations of MDA-MB-231 that exhibit different metastatic tropisms in immuno-deficient mice together with a cohort of 99 primary breast cancers from different subtypes were profiled. | 121                                                | Affymetrix Human Genome U133A Array ( <i>mRNA</i> )                                                                                                                                    | <a href="http://www.ncbi.nlm.nih.gov/geo/query/acc.cgi?acc=gse2603">http://www.ncbi.nlm.nih.gov/geo/query/acc.cgi?acc=gse2603</a>   |
| GSE16446         | Breast            | 120 primary ER-negative breast tumors of anthracycline-treated patients were profiled.                                                                                                      | 120                                                | [HG-U133_Plus_2] Affymetrix Human Genome U133 Plus 2.0 Array ( <i>mRNA</i> )                                                                                                           | <a href="http://www.ncbi.nlm.nih.gov/geo/query/acc.cgi?acc=GSE16446">http://www.ncbi.nlm.nih.gov/geo/query/acc.cgi?acc=GSE16446</a> |
| GSE19536         | Breast            | 101 breast cancer samples from different subtypes were profiled.                                                                                                                            | 101                                                | Agilent-014850 Whole Human Genome Microarray 4x44K G4112F (Probe Name version) ( <i>mRNA</i> )<br>Agilent-019118 Human miRNA Microarray 2.0 G4470B (miRNA ID version) ( <i>miRNA</i> ) | <a href="http://www.ncbi.nlm.nih.gov/geo/query/acc.cgi?acc=GSE19536">http://www.ncbi.nlm.nih.gov/geo/query/acc.cgi?acc=GSE19536</a> |
| GSE22220         | Breast            | 216 and 210 early primary breast tumors from different subtypes were used for mRNA and miRNA profiling respectively. 207 samples from each group were matched.                              | 426                                                | Illumina humanRef-8 v1.0 expression beadchip ( <i>mRNA</i> )<br>Illumina Human v1 MicroRNA expression beadchip ( <i>miRNA</i> )                                                        | <a href="http://www.ncbi.nlm.nih.gov/geo/query/acc.cgi?acc=gse22220">http://www.ncbi.nlm.nih.gov/geo/query/acc.cgi?acc=gse22220</a> |
| GSE38167         | Breast            | 31 primary TNBC cases, 13 lymph node metastases and 23 matched normal breast tissues were profiled. 9 cases had matched normal, primary and lymph node metastasis.                          | 67                                                 | Agilent-029297 Human miRNA Microarray (Feature Number version) ( <i>miRNA</i> )                                                                                                        | <a href="http://www.ncbi.nlm.nih.gov/geo/query/acc.cgi?acc=gse38167">http://www.ncbi.nlm.nih.gov/geo/query/acc.cgi?acc=gse38167</a> |
| GSE40059         | Breast            | 10 breast cancer cell lines (4 aggressive and 6 less aggressive) and 2 immortalized breast epithelium cell lines were profiled.                                                             | 12                                                 | [HG-U133_Plus_2] Affymetrix Human Genome U133 Plus 2.0 Array ( <i>mRNA</i> )<br>[miRNA-1_0] Affymetrix miRNA Array ( <i>miRNA</i> )                                                    | <a href="http://www.ncbi.nlm.nih.gov/geo/query/acc.cgi?acc=GSE40059">http://www.ncbi.nlm.nih.gov/geo/query/acc.cgi?acc=GSE40059</a> |
| GSE45666         | Breast            | 101 breast tumors from different subtypes and 15 matched adjacent breast normal tissue samples were profiled.                                                                               | 116                                                | Agilent-021827 Human miRNA Microarray G4470C (Feature Number version) ( <i>miRNA</i> )                                                                                                 | <a href="http://www.ncbi.nlm.nih.gov/geo/query/acc.cgi?acc=gse45666">http://www.ncbi.nlm.nih.gov/geo/query/acc.cgi?acc=gse45666</a> |
| GSE58606         | Breast            | 11 normal breast and 122 breast cancer samples from different subtypes were profiled.                                                                                                       | 133                                                | miRCURY LNA microRNA Array 7th generation - human, mouse & rat [product# 208502] (miRBase 18.0) ( <i>miRNA</i> )                                                                       | <a href="http://www.ncbi.nlm.nih.gov/geo/query/acc.cgi?acc=GSE58606">http://www.ncbi.nlm.nih.gov/geo/query/acc.cgi?acc=GSE58606</a> |
| GSE58644         | Breast            | 321 samples from breast cancer patients from different subtypes were profiled.                                                                                                              | 321                                                | [HuGene-1_0-st] Affymetrix Human Gene 1.0 ST Array [transcript (gene) version] ( <i>mRNA</i> )                                                                                         | <a href="http://www.ncbi.nlm.nih.gov/geo/query/acc.cgi?acc=GSE58644">http://www.ncbi.nlm.nih.gov/geo/query/acc.cgi?acc=GSE58644</a> |
| METABRIC project | Breast            | 1,302 breast tumors with detailed clinical annotation and long-term follow-up were profiled for mRNA and miRNA expression.                                                                  | 1302                                               | Illumina HT 12 ( <i>mRNA</i> ) Agilent ncRNA 60k ( <i>miRNA</i> )                                                                                                                      | <a href="https://www.ebi.ac.uk/ega/studies/EGAS00000000122">https://www.ebi.ac.uk/ega/studies/EGAS00000000122</a>                   |
| KM Plotter       | Breast<br>Ovarian | This online database can access patient data from several public datasets of breast, ovarian, lung and gastric cancer                                                                       | 558 Breast and 528 Ovarian (with known p53 status) | Affymetrix HG-U133A, HG-U133 Plus 2.0 and HG-U133A 2.0 ( <i>mRNA</i> )                                                                                                                 | <a href="http://kmplot.com/analysis/index.php?p=background">http://kmplot.com/analysis/index.php?p=background</a>                   |



**Supplementary Table S5: Sequences of forward and reverse primers used in qRT-PCR analysis**

| Gene Symbol | Gene ID | Forward Primer               | Reverse Primer                  |
|-------------|---------|------------------------------|---------------------------------|
| CTBP1       | 1487    | 5'-acccttactgtcggatggc-3'    | 5'-atgaggtggtggtgtgct-3'        |
| CDH1        | 999     | 5'-cccgggacaacgtttattac-3'   | 5'-gctggctcaagtcaaagtcc-3'      |
| KRT18       | 3875    | 5'-tgatgacaccaatatacacga-3'  | 5'-ggctttaggccttttactcc-3'      |
| ZO1         | 7082    | 5'-cagagccttctgatcattcca-3'  | 5'-catctctactccggagactgc-3'     |
| ZEB1        | 6935    | 5'-gggaggagcagtgaaagaga-3'   | 5'-tttctgcccttcttctg-3'         |
| ZEB2        | 9839    | 5'-aagccaggacagatcagc-3'     | 5'-ccacactctgtgcatttgaact-3'    |
| FN          | 2335    | 5'-ctggccgaaaatacattgtaa-3'  | 5'-ccacagtcgggtcaggag-3'        |
| SNAI2       | 6591    | 5'-tggttcttcaaggacacat-3'    | 5'-gttcagtgagggaagaa-3'         |
| MMP9        | 4318    | 5'-gaaccaatctcaccagagg-3'    | 5'-gccaccgagtgtaaccata-3'       |
| NOXA        | 5366    | 5'-atgaatgcacctcacattcct-3'  | 5'-tccagcagagctggaagtcgagtgt-3' |
| p21         | 1026    | 5'-tgagccgcgactgtgatg-3'     | 5'-gtctcggtgacaaagtcgaagt-3'    |
| p53         | 7157    | 5'-ccaagcaatggatgattga-3'    | 5'-ggcattctgggagctcatct-3'      |
| BAX         | 581     | 5'-gggtggtgggtgagactc-3'     | 5'-agacacgtaaggaaaacgcatta-3'   |
| HPRT        | 3251    | 5'-tgacctgatttatttgcatacc-3' | 5'-cgagcaagacgttcagtct-3'       |
| ACTB        | 60      | 5'-ccaaccgcgagaagatga-3'     | 5'-ccagaggctacagggatag-3'       |
| GAPDH       | 2597    | 5'-gcccaatacaccataatcc-3'    | 5'-agccacatcgtctcagacac-3'      |
| MYC         | 4609    | 5'-cagctgcttagacgtggattt-3'  | 5'-accgagtcgtagtcgaggtcat-3'    |
| PUMA        | 27113   | 5'-ccagggtctgtccacgacg-3'    | 5'-aactgcccaggaccagg-3'         |

**Supplementary Table S6: List of antibodies used in Western blot analysis**

| Antibody              | Firm                      | Catalog number |
|-----------------------|---------------------------|----------------|
| CTBP1                 | BD                        | 612042         |
| Beta-actin            | MP Biomedicals            | 691001         |
| Cleaved Caspase 3     | Cell Signaling Technology | 9661           |
| CDK2                  | Sigma                     | C5223          |
| CDK4                  | Epitomics                 | 2341-1         |
| Cyclin D1             | Cell Signaling Technology | 2922           |
| Phospho-Rb (S807/811) | Cell Signaling Technology | 8516           |
| p53                   | Cell Signaling Technology | 2527           |
| p21                   | BD Biosciences            | 554228         |
| Noxa                  | Santa Cruz Biotechnology  | SC-30209       |
| p-Cdc2                | Cell signaling Technology | 2543S          |
| p-Cdc25C              | Cell signaling Technology | 4901S          |
| ZO1                   | Cell Signaling Technology | 13663          |
| Fibronectin           | Santa Cruz Biotechnology  | SC-81767       |
| ZEB-1                 | Cell Signaling Technology | 3396           |
| Vimentin              | Cell Signaling Technology | 5741           |
